# Supplementary material for: One-pot and facile synthesis of anti-biofouling polymer-modified gadolinium-based nanoprobes for dual-modal imaging and long-lasting tracking
Source: Royal Society of Chemistry journal article supplement (doi:10.1039/c5nj00150a), 2015-01-01
Supplement: c5nj00150a1.pdf [file c5nj00150a1.pdf]

**Supporting information for:**

**PEGylated Gadolinium-Based Nanoprobes for Dual-Modal  
Imaging and Long-Lasting Tracking**

*Lingling Song<sup>b</sup>, Zhenping Qi<sup>c</sup>, Dapeng Qu<sup>b</sup>, and Di Wu<sup>a,\*</sup>*

*<sup>a</sup> Color Ultrasonic Room, Affiliated Hospital of Chifeng University, Chifeng 024005,  
China*

*E-mail: cfxwudi@163.com*

*<sup>b</sup> Coordination Administration Office, Affiliated Hospital of Chifeng University,  
Chifeng 024005, China*

*<sup>c</sup> CT Room, Affiliated Hospital of Chifeng University, Chifeng 024005, China*

**Table S1** CT values of various organs of a rat before and after intravenous administration of PEG-GdNPs at different time intervals.

| Time          | Heart | Liver | Spleen | Kidneys   |
|---------------|-------|-------|--------|-----------|
| Pre-injection | 45.4  | 58.3  | 55.1   | 45.7/46.4 |
| 15 min        | 53.4  | 89.2  | 70.3   | 46.8/46.9 |
| 30 min        | 48.1  | 105.7 | 98.4   | 47.1/46.6 |
| 60 min        | 49.4  | 136.4 | 123.1  | 46.9/47.6 |
| 120 min       | 46.3  | 157.9 | 134.2  | 48.1/47.5 |
